# Supplementary material
Source: PubMed Central journal article supplement (PMC7261218)
Supplement: NIHMS1591318-supplement-Materials.pdf [file NIHMS1591318-supplement-Materials.pdf]

Materials List for:

# Synthesis, Functionalization, and Characterization of Fusogenic Porous Silicon Nanoparticles for Oligonucleotide Delivery

Byungji Kim<sup>1</sup>, Michael J. Sailor<sup>1,2</sup>

<sup>1</sup>Materials Science and Engineering Program, University of California, San Diego

<sup>2</sup>Department of Chemistry and Biochemistry, University of California, San Diego

Correspondence to: Byungji Kim at [byk022@eng.ucsd.edu](mailto:byk022@eng.ucsd.edu)

URL: <https://www.jove.com/video/59440>

DOI: [doi:10.3791/59440](https://doi.org/10.3791/59440)

## Materials

| Name                                                                                                                               | Company                  | Catalog Number | Comments                                                                                                               |
|------------------------------------------------------------------------------------------------------------------------------------|--------------------------|----------------|------------------------------------------------------------------------------------------------------------------------|
| 1,2-dimyristoyl-sn-glycero-3-phosphocholine (DMPC)                                                                                 | Avanti Polar Lipids      | 850345P        | Powder                                                                                                                 |
| 1,2-dioleoyl-3-trimethylammonium-propane (chloride salt) (DOTAP)                                                                   | Avanti Polar Lipids      | 890890P        | Powder                                                                                                                 |
| 1,2-distearoyl-sn-glycero-3-phosphoethanolamine-N-[maleimide(polyethylene glycol)-2000] (ammonium salt) (DSPE-PEG(2000) Maleimide) | Avanti Polar Lipids      | 880126P        | Powder                                                                                                                 |
| Aluminum foil                                                                                                                      | VWR International, LLC   | 12175-001      |                                                                                                                        |
| Calcium chloride (CaCl <sub>2</sub> )                                                                                              | Spectrum                 | C1977          | Anhydrous, Pellets                                                                                                     |
| Chloroform                                                                                                                         | Fisher Scientific        | C6061          |                                                                                                                        |
| Computer                                                                                                                           | Dell                     | Dimension 9200 | Any computer with PCI card slot is acceptable                                                                          |
| Dil Stain (1,1'-Diocetadecyl-3,3',3'-Tetramethylindocarbocyanine Perchlorate ('Dil'; DiIc18(3)))                                   | Life Technologies        | D3911          |                                                                                                                        |
| Ethanol (EtOH)                                                                                                                     | UCSD Store               | 111            | 200 Proof                                                                                                              |
| Hydrofluoric acid (HF)                                                                                                             | VWR International, LLC   | MK264008       | Purity: 48%                                                                                                            |
| Keithley 2651a Sourcemeter                                                                                                         | Keithley                 | 2651A          |                                                                                                                        |
| LabVIEW                                                                                                                            | National Instruments     |                | Sample program available at: <a href="http://sailorgroup.ucsd.edu/software/">http://sailorgroup.ucsd.edu/software/</a> |
| LysoTracker Green DND-26                                                                                                           | Thermo Fisher Scientific | L7526          |                                                                                                                        |
| Liposome extrusion set with heating block                                                                                          | Avanti Polar Lipids      | 610000         |                                                                                                                        |
| Microcon-30kDa Centrifugal Filter Unit                                                                                             | EMD Millipore            | MRCF0R030      |                                                                                                                        |
| O-ring                                                                                                                             | ChemGlass                | CG-305-220     |                                                                                                                        |
| Phosphate-buffered saline (PBS)                                                                                                    | Thermo Fisher Scientific | 10010-049      |                                                                                                                        |
| Platinum coil                                                                                                                      | VWR International, LLC   | AA10285-BU     |                                                                                                                        |
| Potassium hydroxide (KOH)                                                                                                          | Fisher Scientific        | P250-3         |                                                                                                                        |
| Silicon wafer                                                                                                                      | Siltronix                | Custom order   |                                                                                                                        |
| siRNA                                                                                                                              | Dharmacon                | Custom order   | IRF5, sense 5'-dTdT-CUG CAG AGA AUA ACC CUG A-dTdT-3' and antisense 5'-dTdT UCA GGG UUA UUC UCU GCA G dTdT-3'          |
| Sonicator                                                                                                                          | VWR International, LLC   | 97043-960      |                                                                                                                        |

|                                            |                                       |              |                                                                                                          |
|--------------------------------------------|---------------------------------------|--------------|----------------------------------------------------------------------------------------------------------|
| Targeting peptide (CRV)                    | CPC Scientific                        | Custom order | sequence CRVLRSGSC; made cyclic by a disulfide bond between the side chains of the two cysteine residues |
| Teflon etch cell                           | Interface Performance Materials, Inc. | Custom order |                                                                                                          |
| UltraPure DNase/RNase-Free Distilled Water | Thermo Fisher Scientific              | 10977015     |                                                                                                          |
